# Supplementary material
Source: publisher site journal article supplement (https://static.cambridge.org/content/id/urn:cambridge.org:id:article:S0958344023000071/resource/name/S0958344023000071supp001.docx)
Supplement: Supplementary file 1 [file S0958344023000071supp001.docx]

Appendix 1a – Summary of Results for Multiple Regression Analyses (Model 1)

*p<0.05

Note: Figures in bold and underlined are figures that change

Appendix 1b – Summary of Results for Multiple Regression Analyses (Model 2)

*p<0.05

Note: Figures in bold and underlined are figures that change

Appendix 1c – Summary of Results for Multiple Regression Analyses (Model 3)

|  | **Model 3** | | | |
| --- | --- | --- | --- | --- |
| **Variables** | **Original** | **Current - First Trial** | **Current - Final Trial** | **% Change** |
| **Target Variable** | Phonotactics Quiz Score | | | |
| **Independent Variables** |  |  |  |  |
| (Intercept) | -195.16 | -195.16 | -191.40 |  |
| Sex (Male) | -19.78 | -19.78 | -18.70 |  |
| Secondary School Writing Exam | -0.36 | -0.36 | -0.40 |  |
| Secondary School Oral Exam | **3.01*** | **3.01*** | **3.00** | **-0.33%** |
| Visited at least once (No) | 4.87 | 4.87 | 4.98 |  |
| Raw No. of Visit | 0.42 | 0.42 | - |  |
| No. of Visits on Distinct Days | **0.47** | **0.47** | **1.03** | **119.15%** |
| Raw No. of Input | 0.15 | 0.15 | - |  |
| No. of Distinct Input | **-0.52** | **-0.52** | **-0.36** | **-30.77%** |
| Mean Duration of Visit (in Seconds) | **0.02*** | **0.02*** | **0.02*** |  |
| No. of Visits within 7 days before assessment | 0.71 | 0.71 | 0.67 |  |
| No. of Visits within 1 day before assessment | -0.03 | -0.03 | -0.02 |  |
| Entering Three or more non-words (Yes) | 31.15 | 31.15 | 31.85 |  |
| **Fit Statistics** |  |  |  |  |
| AIC | 554 | 554 | 550 |  |
| BIC | 582 | 582 | 575 |  |
| R2 | 0.3 | 0.3 | 0.3 |  |
| Groups - As random Variable | - | - | - |  |
| F-Statistics | Not Reported | 1.50 | 1.87 |  |

*p<0.05

Note: Figures in bold and underlined are figures that change
